# Supplementary material
Source: publisher figshare collection journal article supplement (https://frontiersin.figshare.com/ndownloader/files/12403499)
Supplement: Supplementary file [file 12403499]

*Supplementary Material*

**An uncharacterized major facilitator superfamily  
transporter from *Planococcus maritimus* exhibits dual  
functions as a  $\text{Na}^+(\text{Li}^+, \text{K}^+)/\text{H}^+$  antiporter and a multidrug  
efflux pump**

Heba Abdel-motaal, Lin Meng, Zhenglai Zhang, Amro Abdelazez, Shao Li, Tong Xu, Fankui Meng, Shaima Abozaed, Rui Zhang, Juquan Jiang<sup>\*</sup>

<sup>\*</sup> Correspondence: Juquan Jiang: [jjqdainty@163.com](mailto:jjqdainty@163.com)

**Table S1.** Strains, plasmids and primers used in the study.

| Strains, plasmids or primers                       | Relevant phenotype, genotype or primer sequence                                                                                                                                                                                                                | The source or usage                                                       |
|----------------------------------------------------|----------------------------------------------------------------------------------------------------------------------------------------------------------------------------------------------------------------------------------------------------------------|---------------------------------------------------------------------------|
| <b>Strains</b>                                     |                                                                                                                                                                                                                                                                |                                                                           |
| <i>Planococcus maritimus</i> DSM17275 <sup>T</sup> | Type strain of <i>Planococcus maritimus</i> , a slightly halophile                                                                                                                                                                                             | Ordered from German Collection of Microorganisms and Cell Cultures (DSMZ) |
| <i>Escherichia coli</i> KNabc                      | <i>nhaA</i> ::Km <sup>R</sup> , <i>nhaB</i> ::Em <sup>R</sup> , <i>chaA</i> ::Cm <sup>R</sup>                                                                                                                                                                  | Donated by Dr. Terry A. Krulwich                                          |
| <i>Escherichia coli</i> DH5α                       | F <sup>-</sup> , φ80dlacZ ΔM15, Δ( <i>lacZYA-argF</i> )U169, <i>deoR</i> , <i>recA1</i> , <i>endA1</i> , <i>hsdR17(rK<sup>-</sup>, mK<sup>+</sup>)</i> , <i>phoA</i> , <i>supE44</i> , λ <sup>-</sup> , <i>thi</i> <sup>-1</sup> , <i>yrA96</i> , <i>relA1</i> | Takara Biotechnology (Dalian) Co., Ltd., China                            |
| <i>Escherichia coli</i> CM2                        | A major multidrug efflux system-deficient <i>E. coli</i> DH5α mutant (Δ <i>acrAB</i> ), which was obtained by homologous recombination                                                                                                                         | This study                                                                |
| <b>Plasmids</b>                                    |                                                                                                                                                                                                                                                                |                                                                           |
| pUC18                                              | Cloning vector                                                                                                                                                                                                                                                 | Takara Biotechnology (Dalian) Co., Ltd., China                            |
| pUC-PM29                                           | pUC18 carrying a 3.2 kb DNA fragment including 5'-end truncated <i>uvrD</i> and <i>mdrP</i>                                                                                                                                                                    | This study                                                                |
| pET19b                                             | Over-expression vector                                                                                                                                                                                                                                         | Novagen Ltd., USA                                                         |
| pET- <i>mdrP</i>                                   | pET19 carrying <i>mdrP</i> gene                                                                                                                                                                                                                                | This study                                                                |
| pET-truncated <i>uvrD</i>                          | pET19 carrying 5'-end truncated <i>uvrD</i>                                                                                                                                                                                                                    | This study                                                                |
| pKD46                                              | λ Red recombinase expression plasmid with ampicillin resistance                                                                                                                                                                                                | Donated by Dr. W. Todd Lowther                                            |
| pKD3                                               | Template plasmid for a chloramphenicol resistance gene                                                                                                                                                                                                         | Donated by Dr. W. Todd Lowther                                            |
| <b>Primers</b>                                     |                                                                                                                                                                                                                                                                |                                                                           |
| <i>mdrP</i> _F                                     | 5'-CATATGAAGATCAAGGATTGGAA-3' ( <i>Nde</i> I, undelined)                                                                                                                                                                                                       | For the subcloning of <i>mdrP</i> gene                                    |
| <i>mdrP</i> _R                                     | 5'-GGATCCTTATATGTTTCGCAACCGTT-3' ( <i>Bam</i> HI, underlined)                                                                                                                                                                                                  |                                                                           |
| <i>uvrD</i> _F                                     | 5'-CATATGCTCGAGGAATTGGTCTCATT-3' ( <i>Nde</i> I, undelined)                                                                                                                                                                                                    | For the subcloning of 5'-end truncated <i>uvrD</i> gene                   |
| <i>uvrD</i> _R                                     | 5'-GGATCCTTATATCAGTTCCAGCAATT-3' ( <i>Bam</i> HI, underlined)                                                                                                                                                                                                  |                                                                           |
| <i>acrAB</i> _KF                                   | 5'-ATGAACAAAAACAGAGGGTTTACGCCTCTGGCGGTCCATATGAATATCCTCCTTA-3' ( <i>Eco</i> RI, underlined)                                                                                                                                                                     | For the knockout of <i>acrAB</i> genes                                    |
| <i>acrAB</i> _KR                                   | 5'-TCAATGATGATCGACAGTATGGCTGTGCTCGATATCTGTGTAGGCTGGAGCTGCTTC-3' ( <i>Eco</i> RI, underlined)                                                                                                                                                                   |                                                                           |
| <i>acrAB</i> _VF                                   | 5'-TTAGGAAGGAAGCGGGACA-3'                                                                                                                                                                                                                                      | For the verification of <i>acrAB</i> knockout                             |
| <i>acrAB</i> _VR                                   | 5'-AGTGGATCGCCAGGGAATT-3'                                                                                                                                                                                                                                      |                                                                           |

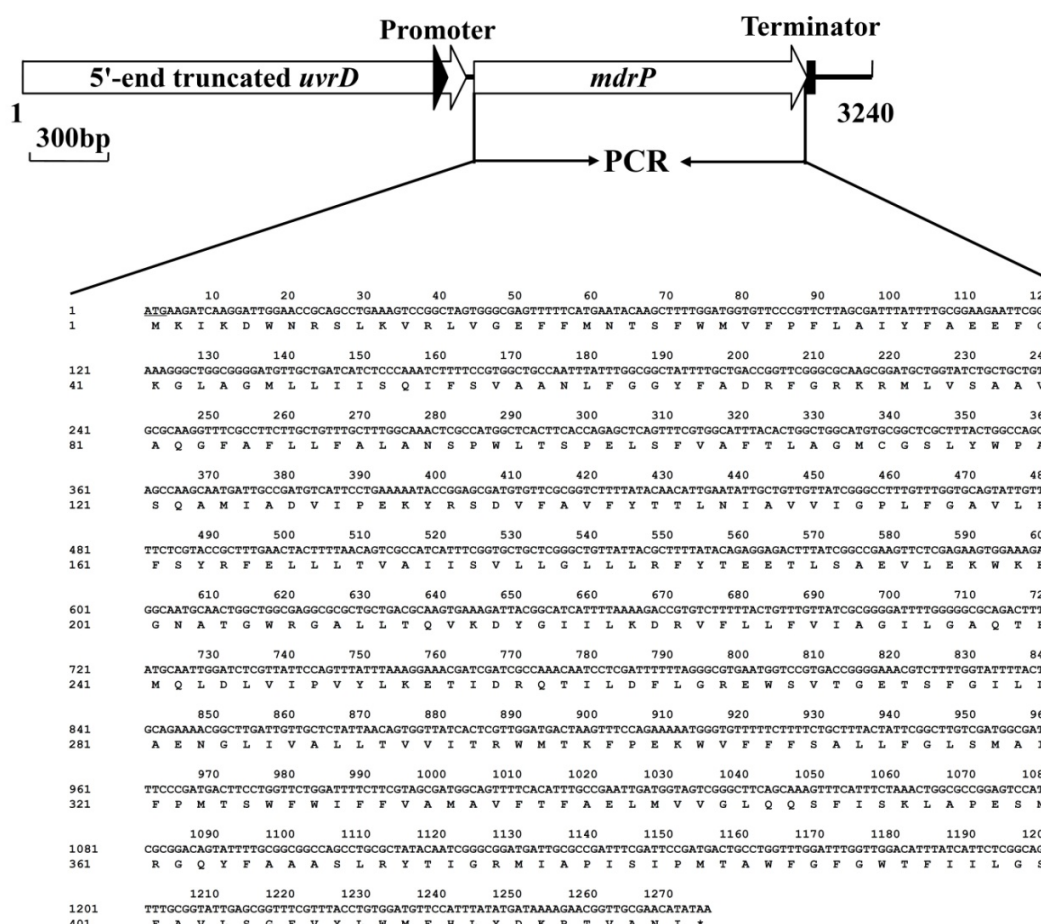

**Fig. S1.** Mapping of the inserted DNA fragment in the recombinant plasmid pUC-PM29 and subcloning of *mdrP* gene.

One 5'-end truncated *uvrD* and one intact *mdrP* are included in this 3.2-kb DNA fragment. The former begins from No. 1 bp of this DNA fragment whereas the latter is preceded by respective promoter-like sequence (filled arrow) and a respective Shine-Dalgarno (SD) sequence (filled rectangle). The sequence of *mdrP* gene from its initiation codon (ATG, underlined) to stop codon (TAA, marked with the star) was subcloned by PCR amplification and fused in frame with an N-terminal His<sub>6</sub> tag into an expression vector pET19b.

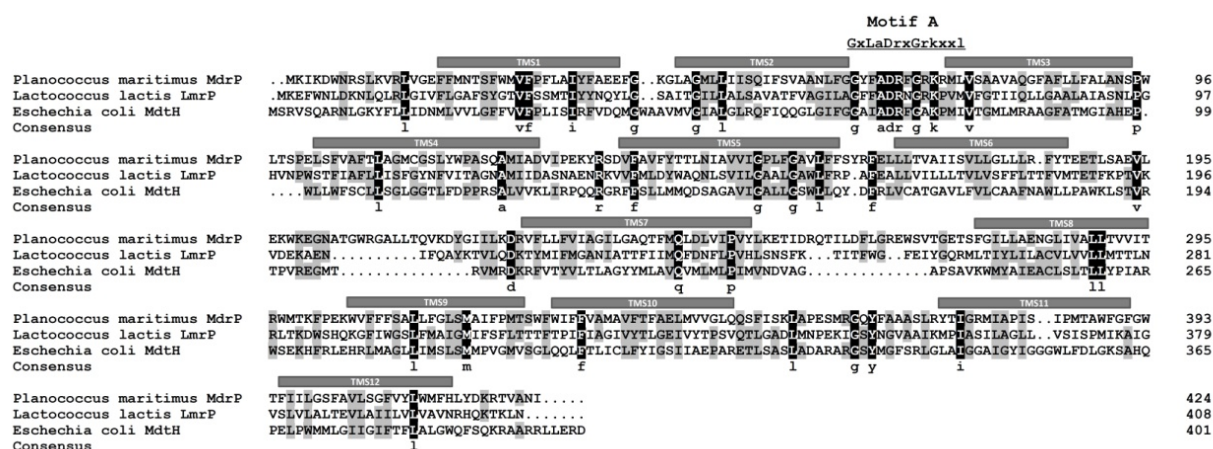

**Fig. S2.** Alignment of MdrP with the solely two characterized DHA1 family multidrug efflux pumps.

MdrP was aligned with the solely two characterized DHA1 family multidrug efflux pumps, *Lactococcus lactis* LmrP (28 %, accession version No. CAA61918.1) and *Escherichia coli* MdtH (22 %, accession version No. P69367.1). Shading homology corresponds to 100 % (black),  $\geq 50$  % (grey) and  $< 50$  % (white) amino acid identity, respectively. The twelve putative transmembrane segments (TMSs) are marked with grey bars above the alignment. The consensus sequence of Motif A was highlighted above the alignment between TMS2 and TMS3.
